# Supplementary material for: Night Work and Sustainable Working Life—A Prospective Trajectory Analysis of Swedish Twins
Source: MDPI journal article supplement (doi:10.3390/ijerph191710857), 2022-08-31
Supplement: s1 [file s1]

**Supplemental Table S1** Relative-risk ratios (RR) with 95% confidence intervals (CI) for sociodemographic factors and night work in relation to sustainable working life trajectory groups among night work discordant twin pairs in SALT cohort (Trajectory group 1: Sustainable working life as reference)

|                                                 | SALT : night work discordant pairs                             |                   |             |                   |                                                                  |            |             |                   |                                                            |                   |      |            |                                                                  |                   |             |                   |
|-------------------------------------------------|----------------------------------------------------------------|-------------------|-------------|-------------------|------------------------------------------------------------------|------------|-------------|-------------------|------------------------------------------------------------|-------------------|------|------------|------------------------------------------------------------------|-------------------|-------------|-------------------|
|                                                 | Trajectory group 2:<br>stable lack of sustainable working life |                   |             |                   | Trajectory group 3: later decreasing<br>sustainable working life |            |             |                   | Trajectory group 4: increasing sustainable<br>working life |                   |      |            | Trajectory group 5: early decreasing sustainable working<br>life |                   |             |                   |
|                                                 | MZ                                                             |                   | DZ          |                   | MZ                                                               |            | DZ          |                   | MZ                                                         |                   | DZ   |            | MZ                                                               |                   | DZ          |                   |
|                                                 | RR                                                             | 95%CI             | RR          | 95%CI             | RR                                                               | 95%CI      | RR          | 95%CI             | RR                                                         | 95%CI             | RR   | 95%CI      | RR                                                               | 95%CI             | RR          | 95%CI             |
| Marital status (married or living with someone) | 1.01                                                           | 0.79, 1.29        | 1.02        | 0.85, 1.21        | 1.11                                                             | 0.86, 1.44 | 1.01        | 0.84, 1.21        | 0.81                                                       | 0.55, 1.20        | 0.95 | 0.72, 1.24 | 0.92                                                             | 0.78, 1.10        | 0.96        | 0.84, 1.10        |
| Education                                       |                                                                |                   |             |                   |                                                                  |            |             |                   |                                                            |                   |      |            |                                                                  |                   |             |                   |
| 0-9 years                                       | 1                                                              | ref               | 1           | ref               | 1                                                                | ref        | 1           | ref               | 1                                                          | ref               | 1    | ref        | 1                                                                | ref               | 1           | ref               |
| 10-12 years                                     | 0.92                                                           | 0.69, 1.22        | 1.15        | 0.92, 1.42        | 1.18                                                             | 0.84, 1.65 | 1.06        | 0.84, 1.33        | 1.37                                                       | 0.78, 2.43        | 1.14 | 0.81, 1.60 | 1.13                                                             | 0.92, 1.40        | 1.13        | 0.97, 1.32        |
| >12 years                                       | <b>0.51</b>                                                    | <b>0.36, 0.72</b> | 0.78        | 0.61, 1.00        | 0.77                                                             | 0.52, 1.13 | <b>0.72</b> | <b>0.55, 0.94</b> | 1.11                                                       | 0.59, 2.11        | 0.71 | 0.47, 1.08 | <b>0.69</b>                                                      | <b>0.53, 0.90</b> | <b>0.57</b> | <b>0.46, 0.70</b> |
| Occupational sector                             |                                                                |                   |             |                   |                                                                  |            |             |                   |                                                            |                   |      |            |                                                                  |                   |             |                   |
| Public sector                                   | 1                                                              | ref               | 1           | ref               | 1                                                                | ref        | 1           | ref               | 1                                                          | ref               | 1    | ref        | 1                                                                | ref               | 1           | ref               |
| Private sector                                  | 1.15                                                           | 0.88, 1.49        | 1.21        | 0.99, 1.48        | 1.13                                                             | 0.85, 1.51 | <b>1.28</b> | <b>1.04, 1.59</b> | <b>1.76</b>                                                | <b>1.07, 2.90</b> | 1.33 | 0.96, 1.83 | 1.23                                                             | 0.94, 1.62        | 1.16        | 0.94, 1.44        |
| Other                                           | 0.56                                                           | 0.30, 1.04        | <b>0.63</b> | <b>0.41, 0.98</b> | 0.50                                                             | 0.24, 1.13 | <b>0.53</b> | <b>0.31, 0.90</b> | <b>4.31</b>                                                | <b>2.09, 8.88</b> | 1.38 | 0.72, 2.62 | <b>2.39</b>                                                      | <b>1.56, 3.67</b> | <b>2.84</b> | <b>2.08, 3.87</b> |
| Nightwork*                                      |                                                                |                   |             |                   |                                                                  |            |             |                   |                                                            |                   |      |            |                                                                  |                   |             |                   |
| No (reference)                                  | 1                                                              | ref               | 1           | ref               | 1                                                                | ref        | 1           | ref               | 1                                                          | ref               | 1    | ref        | 1                                                                | ref               | 1           | ref               |
| Yes                                             | 0.90                                                           | 0.72, 1.11        | 0.93        | 0.79, 1.10        | 0.84                                                             | 0.67, 1.05 | <b>0.78</b> | <b>0.66, 0.93</b> | 0.88                                                       | 0.59, 1.30        | 0.93 | 0.71, 1.22 | 0.94                                                             | 0.81, 1.08        | 0.99        | 0.88, 1.11        |
| History of night work*                          |                                                                |                   |             |                   |                                                                  |            |             |                   |                                                            |                   |      |            |                                                                  |                   |             |                   |
| No (reference)                                  | 1                                                              | ref               | 1           | ref               | 1                                                                | ref        | 1           | ref               | 1                                                          | ref               | 1    | ref        | 1                                                                | ref               | 1           | ref               |
| 1-10 years                                      | 1.02                                                           | 0.80, 1.31        | 0.95        | 0.78, 1.15        | 0.75                                                             | 0.57, 1.00 | <b>0.76</b> | <b>0.61, 0.92</b> | 0.92                                                       | 0.59, 1.43        | 0.91 | 0.67, 1.25 | 1.00                                                             | 0.85, 1.18        | 1.04        | 0.91, 1.19        |
| >10 years                                       | <b>0.69</b>                                                    | <b>0.49, 0.97</b> | 0.90        | 0.71, 1.14        | 0.99                                                             | 0.72, 1.35 | 0.83        | 0.65, 1.06        | 0.81                                                       | 0.44, 1.48        | 0.96 | 0.66, 1.40 | 0.82                                                             | 0.65, 1.04        | 0.90        | 0.75, 1.07        |

**Supplemental Table S2** Relative-risk ratios (RR) with 95% confidence intervals (CI) for sociodemographic factors and night work in relation to sustainable working life trajectory groups among night work discordant twin pairs in STAGE-cohort (Trajectory group 1: Sustainable working life as reference)

|                                                 | STAGE: night work discordant twin pairs                 |                   |             |                   |                                                             |                    |      |            |                                                         |                   |             |                   |
|-------------------------------------------------|---------------------------------------------------------|-------------------|-------------|-------------------|-------------------------------------------------------------|--------------------|------|------------|---------------------------------------------------------|-------------------|-------------|-------------------|
|                                                 | Trajectory group 2: decreasing sustainable working life |                   |             |                   | Trajectory group 3: stable lack of sustainable working life |                    |      |            | Trajectory group 4: increasing sustainable working life |                   |             |                   |
|                                                 | MZ                                                      |                   | DZ          |                   | MZ                                                          |                    | DZ   |            | MZ                                                      |                   | DZ          |                   |
|                                                 | RR                                                      | 95%CI             | RR          | 95%CI             | RR                                                          | 95%CI              | RR   | 95%CI      | RR                                                      | 95%CI             | RR          | 95%CI             |
| Marital status (married or living with someone) | 0.79                                                    | 0.49, 1.29        | 0.71        | 0.44, 1.14        | 0.89                                                        | 0.42, 1.90         | 0.53 | 0.19, 1.43 | 0.64                                                    | 0.34, 1.23        | <b>0.44</b> | <b>0.20, 0.98</b> |
| Education                                       |                                                         |                   |             |                   |                                                             |                    |      |            |                                                         |                   |             |                   |
| 0-9 years                                       | 1                                                       | ref               | 1           | ref               | 1                                                           | ref                | 1    | ref        | 1                                                       | ref               | 1           | ref               |
| 10-12 years                                     | 0.88                                                    | 0.36, 2.17        | <b>0.50</b> | <b>0.27, 0.94</b> | 1.39                                                        | 0.31, 6.17         | 0.54 | 0.11, 2.58 | 2.97                                                    | 0.39, 22.64       | 0.64        | 0.22, 1.89        |
| >12 years                                       | <b>0.37</b>                                             | <b>0.14, 0.99</b> | <b>0.22</b> | <b>0.11, 0.47</b> | 0.46                                                        | 0.10, 2.17         | 0.42 | 0.08, 2.30 | 3.11                                                    | 0.40, 24.05       | 0.41        | 0.13, 1.29        |
| Occupational sector                             |                                                         |                   |             |                   |                                                             |                    |      |            |                                                         |                   |             |                   |
| Public sector                                   | 1                                                       | ref               | 1           | ref               | 1                                                           | ref                | 1    | ref        | 1                                                       | ref               | 1           | ref               |
| Private sector                                  | 0.92                                                    | 0.56, 1.52        | <b>2.55</b> | <b>1.51, 4.30</b> | 1.12                                                        | 0.49, 2.56         | 1.04 | 0.40, 2.70 | <b>1.88</b>                                             | <b>1.00, 3.52</b> | 1.37        | 0.65, 2.90        |
| Other                                           | 0.64                                                    | 0.14, 2.96        | 2.79        | 0.93, 8.36        | <b>5.65</b>                                                 | <b>1.79, 17.79</b> | na   | -          | 1.53                                                    | 0.33, 24.05       | 3.55        | 0.96, 13.15       |
| Nightwork*                                      |                                                         |                   |             |                   |                                                             |                    |      |            |                                                         |                   |             |                   |
| No (reference)                                  | 1                                                       | ref               | 1           | ref               | 1                                                           | ref                | 1    | ref        | 1                                                       | ref               | 1           | ref               |
| Yes                                             | 1.02                                                    | 0.77, 1.35        | 1.22        | 0.92, 1.61        | 0.98                                                        | 0.62, 1.53         | 0.64 | 0.36, 1.15 | 0.97                                                    | 0.68, 1.38        | 0.83        | 0.55, 1.24        |
| History of night work*                          |                                                         |                   |             |                   |                                                             |                    |      |            |                                                         |                   |             |                   |
| No (reference)                                  | 1                                                       | ref               | 1           | ref               | 1                                                           | ref                | 1    | ref        | 1                                                       | ref               | 1           | ref               |
| 1-10 years                                      | 1.26                                                    | 0.76, 2.08        | 0.94        | 0.58, 1.54        | 0.80                                                        | 0.39, 1.64         | 0.46 | 0.19, 1.14 | 0.88                                                    | 0.49, 1.57        | 0.90        | 0.46, 1.75        |
| >10 years                                       | 0.51                                                    | 0.16, 1.56        | 0.52        | 0.22, 1.23        | 0.40                                                        | 0.09, 1.76         | 0.16 | 0.02, 1.38 | 0.86                                                    | 0.28, 2.66        | 0.63        | 0.17, 2.27        |

na = not able to be assessed due to low number of observations

**Supplemental Table S3** Descriptive characteristics of SALT- and STAGE-cohorts across baseline nightwork status

|                                                 | SALT                      |     |                              |     | STAGE                   |     |                              |     |
|-------------------------------------------------|---------------------------|-----|------------------------------|-----|-------------------------|-----|------------------------------|-----|
|                                                 | Nightwork<br>(n = 10 697) |     | No nightwork<br>(n = 23 983) |     | Nightwork<br>(n= 6 606) |     | No nightwork<br>(n = 12 689) |     |
|                                                 | Mean                      | SD  | Mean                         | SD  | Mean                    | SD  | Mean                         | SD  |
| Age at baseline                                 | 58.4                      | 8.0 | 59.3                         | 7.9 | 37.3                    | 7.2 | 37.4                         | 7.0 |
|                                                 | n                         | %   | n                            | %   | n                       | %   | n                            | %   |
| Sex (women)                                     | 4448                      | 42  | 13957                        | 58  | 7501                    | 59  | 3252                         | 49  |
| Marital status (married or living with someone) | 6390                      | 60  | 15218                        | 63  | 2325                    | 35  | 5090                         | 40  |
| Education                                       |                           |     |                              |     |                         |     |                              |     |
| 0-9 years                                       | 2865                      | 27  | 7171                         | 31  | 450                     | 7   | 695                          | 5   |
| 10-12 years                                     | 4270                      | 45  | 10248                        | 44  | 3365                    | 51  | 5917                         | 47  |
| >12 years                                       | 2925                      | 28  | 6063                         | 26  | 2789                    | 42  | 6070                         | 48  |
| Occupational sector                             |                           |     |                              |     |                         |     |                              |     |
| Private sector                                  | 3668                      | 35  | 8894                         | 37  | 3185                    | 54  | 6853                         | 60  |
| Public sector                                   | 3750                      | 34  | 7147                         | 30  | 2516                    | 43  | 3962                         | 35  |
| Other                                           | 444                       | 4   | 1271                         | 5   | 195                     | 3   | 538                          | 5   |
| Missing                                         | 2835                      | 27  | 6671                         | 28  | -                       | -   | -                            | -   |

**Supplemental Table S4** Goodness of fit statistics of group-based trajectory analysis models across baseline night work status

|                         | SALT           |          |                 |                 |             |                |          |                 |                 |             |
|-------------------------|----------------|----------|-----------------|-----------------|-------------|----------------|----------|-----------------|-----------------|-------------|
|                         | Nightwork      |          |                 |                 |             | No nightwork   |          |                 |                 |             |
|                         | Smallest group |          | BIC             | AIC             | APP         | Smallest group |          | BIC             | AIC             | APP         |
|                         | N              | %        |                 |                 |             | N              | %        |                 |                 |             |
| 2-cluster model         | 2998           | 36       | -29087.2        | -29069.6        | 0.97        | 6506           | 36       | -63214.8        | -63195.3        | 0.97        |
| 3-cluster model         | 2316           | 24       | -25844.2        | -25816.1        | 0.96        | 4686           | 28       | -56768.4        | 56737.1         | 0.89        |
| 4-cluster model         | 394            | 7        | -24889.8        | -24851.1        | 0.85        | 696            | 6        | -54805.2        | -54762.2        | 0.90        |
| <b>5-cluster model*</b> | <b>398</b>     | <b>7</b> | <b>-24035.4</b> | <b>-23986.2</b> | <b>0.89</b> | <b>836</b>     | <b>7</b> | <b>-52490.7</b> | <b>-52436.1</b> | <b>0.92</b> |
| 6-cluster model         | 463            | 5        | -23831.2        | -23771.5        | 0.89        | 423            | 4        | -51896.6        | -51830.3        | 0.88        |
| 7-cluster model         | 258            | 5        | -23496.0        | -23425.7        | 0.86        | 145            | 3        | -51826.1        | -51748.1        | 0.86        |
| 8-cluster model         | 135            | 3        | -23457.3        | -23376.5        | 0.78        | -              | 0        | -51022.0        | -50932.2        | -           |
| STAGE                   |                |          |                 |                 |             |                |          |                 |                 |             |
| 2-cluster model         | 784            | 12       | -13662.0        | -13645.1        | 0.99        | 1334           | 11       | -23937.3        | -23918.7        | 0.97        |
| 3-cluster model         | 430            | 7        | -12703.5        | -12676.4        | 0.97        | 745            | 6        | -22002.6        | -21972.9        | 0.96        |
| <b>4-cluster model*</b> | <b>346</b>     | <b>5</b> | <b>-12369.8</b> | <b>-12332.6</b> | <b>0.85</b> | <b>621</b>     | <b>5</b> | <b>-21301.7</b> | <b>-21249.8</b> | <b>0.89</b> |
| 5-cluster model         | 215            | 3        | -12213.0        | -12165.6        | 0.91        | 346            | 3        | -21216.1        | -21164.1        | 0.87        |
| 6-cluster model         | 111            | 2        | -12158.7        | -12101.1        | 0.86        | 180            | 1        | -20968.9        | -20905.8        | 0.84        |

\* The models presented are shown in bold. BIC = Bayesian Information Criterion, AIC = Akaike Information Criterion, and APP = average posterior probability.

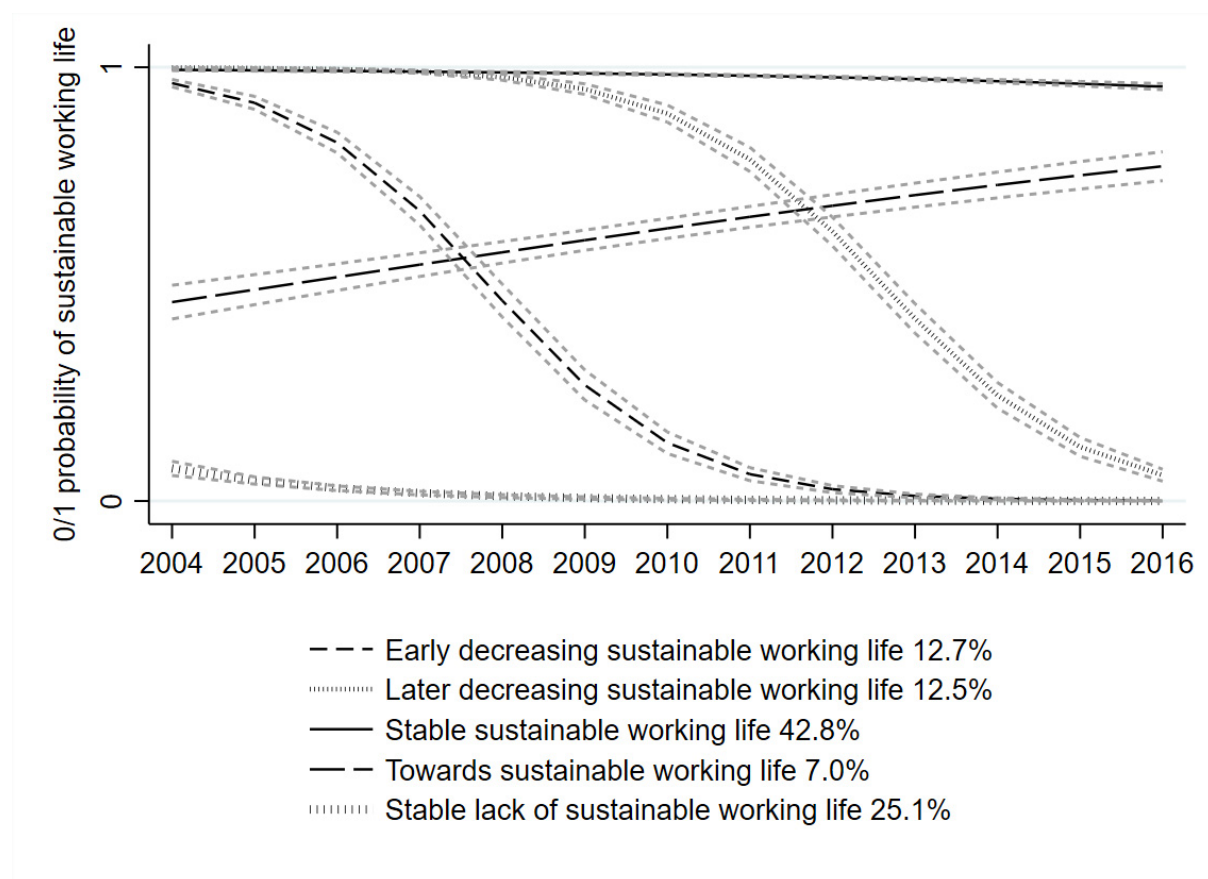

**Supplemental Figure S1** Those with baseline nightwork in SALT cohort

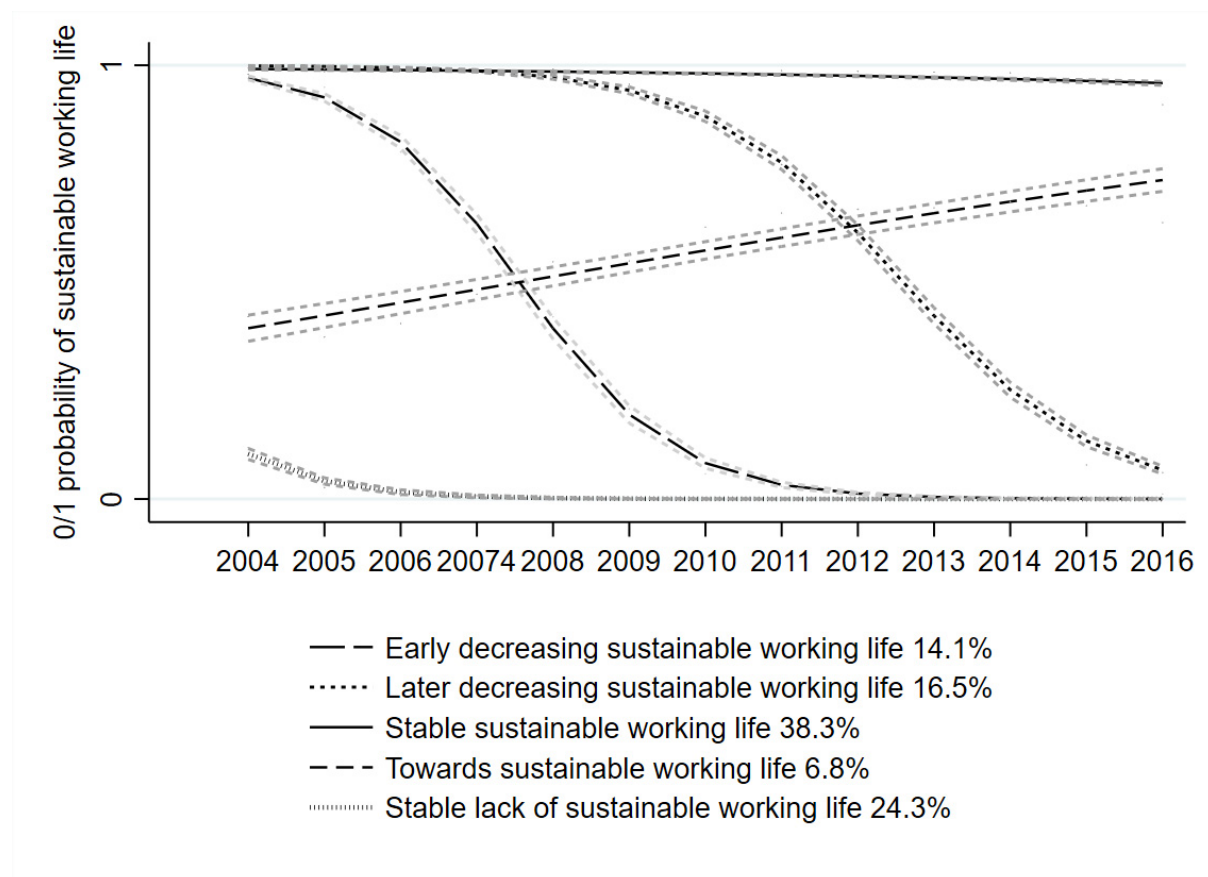

**Supplemental Figure S2** Those without baseline nightwork in SALT-cohort

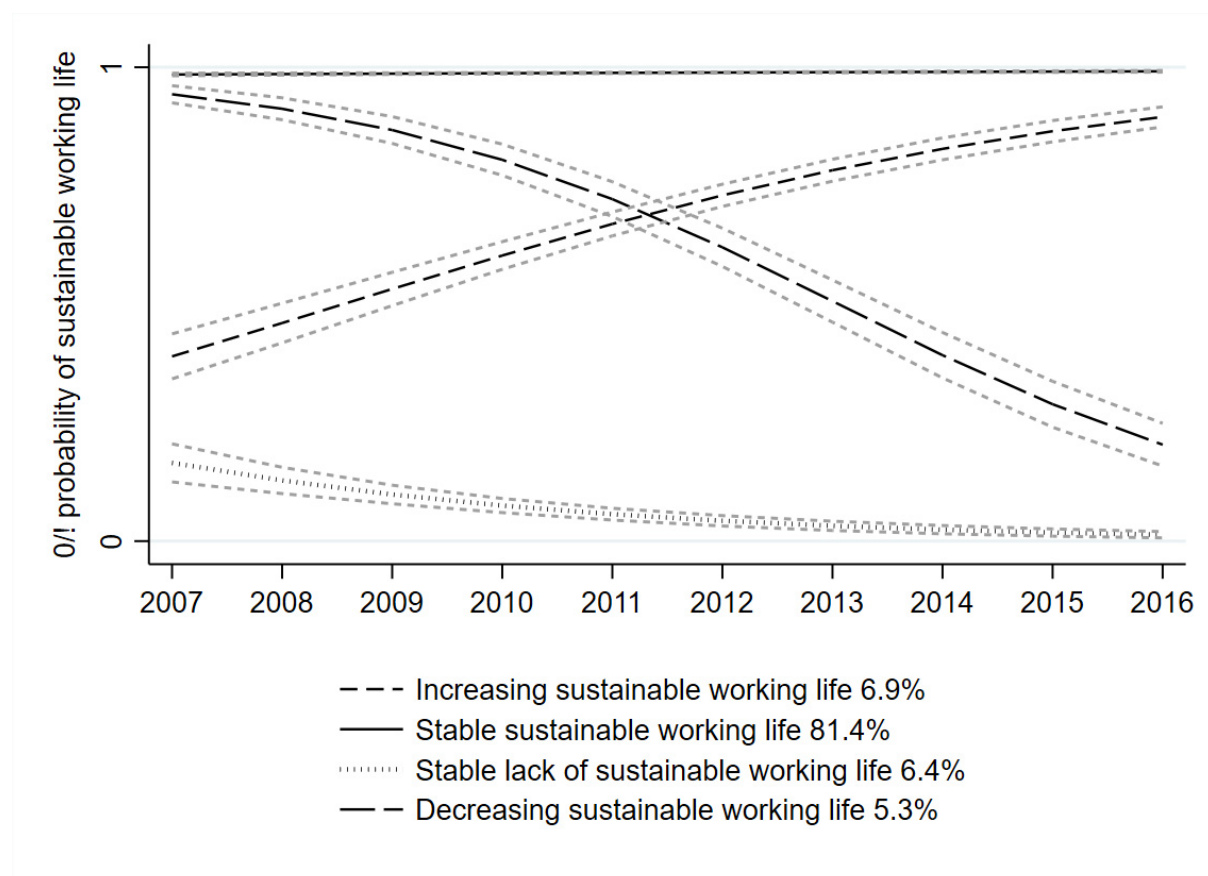

**Supplemental Figure S3** Those with nightwork in STAGE-cohort

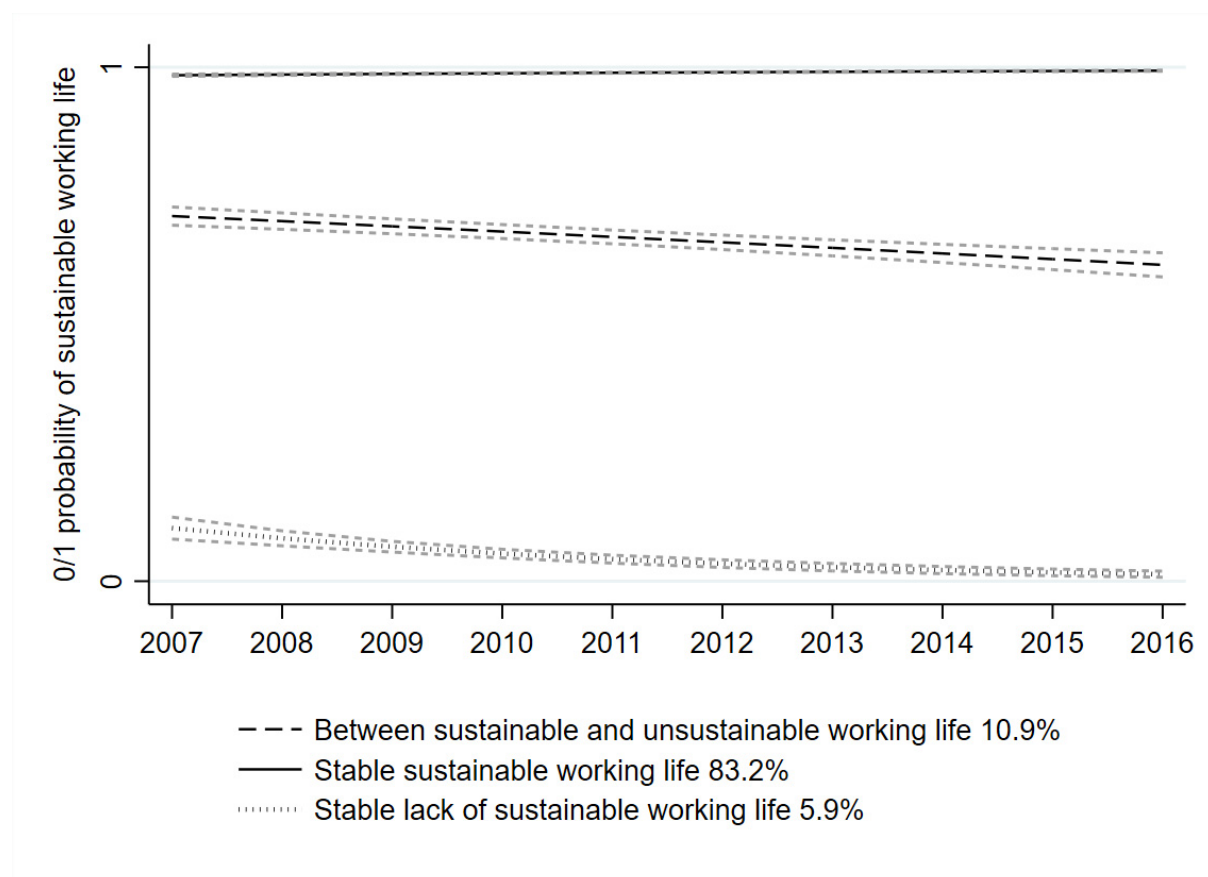

**Supplemental Figure S4** Those without nightwork in STAGE-cohort
